# Supplementary material for: Effects of Ba–O codoping on the photocatalytic activities of Ta3N5photocatalyst: a DFT study
Source: Royal Society of Chemistry journal article supplement (doi:10.1039/c4ra11053f), 2014-10-20
Supplement: c4ra11053f1.pdf [file c4ra11053f1.pdf]

## Supporting Information

For

### Effects of Ba-O codoping on the photocatalytic activities of Ta<sub>3</sub>N<sub>5</sub>

#### photocatalyst: a DFT study

Jiajia Wang,<sup>ab</sup> Aibin Ma,<sup>\*ac</sup> Zhaosheng Li,<sup>\*b</sup> Jinghua Jiang,<sup>ac</sup> Jianyong Feng<sup>b</sup> and Zhigang Zou<sup>b</sup>

<sup>a</sup> *College of Mechanics and Materials, Hohai University, Nanjing 210098, China.*

<sup>b</sup> *National Laboratory of Solid State Microstructures, Department of Physics, Ecomaterials and Renewable Energy Research Center (ERERC), and College of Engineering and Applied Sciences, Nanjing University, Nanjing 210093, People's Republic of China.*

<sup>c</sup> *Jiangsu collaborative innovation center of advanced micro/nano materials & equipment, Nanjing 210094, China.*

\* Corresponding Authors: Tel: +86-25-83787239, Fax: +86-25-83786046. E-mail: [aibin-ma@hhu.edu.cn](mailto:aibin-ma@hhu.edu.cn)(A.B. MA) or [zsl@nju.edu.cn](mailto:zsl@nju.edu.cn)(Z. S. Li)

## SI-1 Chemical potentials of N, O, Ba and Ta

The chemical potentials of N, O, Ba and Ta are calculated by two steps: First, we calculate the chemical potentials of N ( $\Delta\mu_N$ ) and Ta ( $\Delta\mu_{Ta}$ ). Under thermal equilibrium growth conditions,  $Ta_3N_5$  should satisfy:

$$3\Delta\mu_{Ta} + 5\Delta\mu_N = E_{Ta_3N_5}^f = -8.47eV \quad (S1)$$

where  $E_{Ta_3N_5}^f$  is the calculated formation energy of the undoped  $Ta_3N_5$ . Then,  $\Delta\mu_N$  and  $\Delta\mu_{Ta}$  under different growth conditions can be determined: under Ta-rich (N-poor) growth condition,  $\Delta\mu_N = -1.69$  and  $\Delta\mu_{Ta} = 0$  eV; under N-rich (Ta-poor) growth condition,  $\Delta\mu_N = 0$  and  $\Delta\mu_{Ta} = -2.82$  eV.

Second, we calculate chemical potentials of the two doped elements, Ba ( $\Delta\mu_{Ba}$ ) and O ( $\Delta\mu_O$ ). In the doped materials, precipitation of secondary phases should be avoided.<sup>1</sup> For the Ba-O codoped  $Ta_3N_5$ , precipitation of secondary phases such as  $Ta_2O_5$ , TaON, BaO,  $BaN_6$ ,  $BaN_2O_6$ ,  $Ba_2TaN_3$ ,  $N_2$  gas,  $O_2$  gas, bulk Ba and bulk Ta must be avoided:

$$5\Delta\mu_O + 2\Delta\mu_{Ta} < E_{Ta_2O_5}^f = -20.20eV \quad (S2)$$

$$\Delta\mu_N + \Delta\mu_O + \Delta\mu_{Ta} < E_{TaON}^f = -5.79eV \quad (S3)$$

$$\Delta\mu_{Ba} + \Delta\mu_O < E_{BaO}^f = -4.97eV \quad (S4)$$

$$\Delta\mu_{Ba} + 6\Delta\mu_N < E_{BaN_6}^f = -1.39eV \quad (S5)$$

$$\Delta\mu_{Ba} + 2\Delta\mu_N + 6\Delta\mu_O < E_{BaN_2O_6}^f = -10.25eV \quad (S6)$$

$$2\Delta\mu_{Ba} + \Delta\mu_{Ta} + 3\Delta\mu_N < E_{Ba_2TaN_3}^f = -6.50eV \quad (S7)$$

$$\Delta\mu_N < 0, \Delta\mu_O < 0, \Delta\mu_{Ba} < 0, \Delta\mu_{Ta} < 0 \quad (S8)$$

where  $E_{Ta_2O_5}^f$ ,  $E_{TaON}^f$ ,  $E_{BaO}^f$ ,  $E_{BaN_6}^f$ ,  $E_{BaN_2O_6}^f$  and  $E_{Ba_2TaN_3}^f$  are formation energies of  $Ta_2O_5$ , TaON, BaO,  $BaN_6$ ,  $BaN_2O_6$  and  $Ba_2TaN_3$ , respectively. Based on the above inequations (S2)-

(S8), we can calculate the chemical potentials of Ba and O under Ta-rich and N-rich growth conditions, which are shown in Fig. S1(a) and S1(b), respectively. It can be seen that, to simultaneously avoid precipitation of all secondary phases, the values of  $\Delta\mu_{\text{Ba}}$  and  $\Delta\mu_{\text{O}}$  can only be selected in the accessible regions [shaded in Fig. S1(a) and S1(b)]. In the accessible regions, the values of  $\Delta\mu_{\text{Ba}}$  and  $\Delta\mu_{\text{O}}$  under Ti-rich and N-rich growth conditions are selected at the blue points in Fig. S1(a) and S1(b), respectively, because formation energies of  $\text{Ba}_{\text{Ta}}+3\text{O}_{\text{N}}$  at the blue points are relatively smaller. This means that the codoped concentrations of Ba and O at the blue points are larger. Under the Ti-rich condition,  $\Delta\mu_{\text{Ba}} = -0.87$  and  $\Delta\mu_{\text{O}} = -4.10$  eV; under the N-rich condition;  $\Delta\mu_{\text{Ba}} = -2.00$  and  $\Delta\mu_{\text{O}} = -2.97$  eV.

## SI-2 The $S_{\text{bottom}}$ term

In geometry relaxation of the undoped,  $\text{O}_{\text{N}}$ -doped,  $\text{Ba}_{\text{Ta}}$ -doped,  $\text{Ba}_{\text{Ta}}+\text{O}_{\text{N}}$  codoped,  $\text{Ba}_{\text{Ta}}+2\text{O}_{\text{N}}$  codoped and  $\text{Ba}_{\text{Ta}}+3\text{O}_{\text{N}}$  codoped  $\text{Ta}_3\text{N}_5$  (100) surfaces, the two bottom atomic layers are fixed while other layers are allowed relaxation. This slab model is the non-symmetrical structure. After geometry relaxation, the atomic structure of the bottom surface is different from that of the top surface, and thus surface energy of the bottom surface is also different from that of the top surface. Therefore, to obtain the surface energy of the top surface, which is exactly what we really concern, the surface energy of the fixed bottom surface, i.e., the  $S_{\text{bottom}}$ , must be subtracted. The  $S_{\text{bottom}}$  is defined as:<sup>2,3</sup>

$$S_{\text{bottom}} = (E_{\text{slab}} - n_{\text{N}}\Delta\mu_{\text{N}} - n_{\text{Ta}}\Delta\mu_{\text{Ta}})/(2A) \quad (\text{S9})$$

where  $n_i$  and  $\Delta\mu_i$  ( $i=\text{N}, \text{Ta}$ ) are the number and chemical potential of constituent  $i$ , respectively, and  $A$  ( $106.81 \text{ \AA}^2$ ) is the surface area of the slab model. The  $E_{\text{slab}}$  term in

equation (S9) is calculated by using of the undoped  $\text{Ta}_3\text{N}_5$  (100) surface model WITHOUT any geometry relaxations. Since the two sides of the non-relaxed  $\text{Ta}_3\text{N}_5$  (100) surface model are completely identical, the term “2” should be divided.

To assure the reliability of our calculated surface energies, we also calculate surface energies of the undoped and  $\text{O}_\text{N}$ -doped  $\text{Ta}_3\text{N}_5$  (100) surfaces using the symmetrical slab model. The symmetrical slab model is constructed by eleven  $\text{Ta}_6\text{N}_{10}$  atomic layers. In the process of geometry relaxations, the central  $\text{Ta}_6\text{N}_{10}$  atomic layer is fixed while the rest five  $\text{Ta}_6\text{N}_{10}$  atomic layers on each side of the slab model are allowed to relax. The calculated surface energies using the symmetrical and non-symmetrical slab models are listed in Table S1. It can be seen that, the surface energies calculated by the symmetrical slab model are in good agreement with that by the non-symmetrical model. This means that the seven non-symmetrical slab model is sufficient in this study, and the method of subtraction the  $S_{\text{bottom}}$  term in surface energy calculation is reasonable.

### **SI-3 Atomic structures of the $\text{Ba}_{\text{Ta}}+\text{O}_\text{N}$ , $\text{Ba}_{\text{Ta}}+2\text{O}_\text{N}$ and $\text{Ba}_{\text{Ta}}+3\text{O}_\text{N}$ models**

The Fig. S2 shows the atomic structure of the  $\text{Ta}_3\text{N}_5$  supercell. It can be seen that, the Ta atom is coordinated with six N atoms. Among the six N atoms in the Ta-N octahedron, four N atoms are the 4-coordinated N atoms while the other two N atoms are the 3-coordinated N atoms. Note that, the position of the  $\text{N}_\text{a}$  is EQUIVALENT to that of the  $\text{N}_\text{b}$ . Although many N atoms in this supercell can be substituted by the O atom, only N atoms in the Ta-N octahedron are substituted in this study for simplicity purpose. Since both theoretical calculations<sup>3</sup> and experiments<sup>4</sup> have proved that the 3-coordinated N atom is easily substituted

by the O atom, the  $O_N$  impurities in  $Ba_{Ta}+O_N$  and  $Ba_{Ta}+2O_N$  are simulated by substitution of O atoms for the 3-coordinated N atoms.

We use the Fig. S3 to illustrate configurations of all possible  $Ba_{Ta}+3O_N$  codoped bulk  $Ta_3N_5$  structures. For clarity purpose, four N atoms are denoted as the ‘plane’ atoms, while the left two N atoms are denoted as the ‘point’ atoms. As shown in the Fig. S2, positions of the two ‘point’ N atoms are equivalent to each other. Then, substitutions of three O atoms for three N atoms can be divided into three conditions:

First, zero ‘point’ N atoms are substituted by O atoms, while three ‘plane’ N atoms are substituted by three O atoms, which can be simply denoted as ‘0point+3plane’. There are four possible configurations of ‘0point+3plane’. The second and third conditions are ‘1point+2plane’ and ‘2point+1plane’, which include six and four possible atomic configurations, respectively. Moreover, the total energies (relative to the total energy of the undoped  $Ta_3N_5$ ) of all 14 configurations are listed in the following Table S2, which is helpful for readers to make a direct and in-depth understanding. It can be seen that, the total energy of the atomic configuration (h) is relatively smaller among all considered configurations. Therefore, the configuration (h) is adopted to simulate the  $Ba_{Ta}+3O_N$  codoped bulk  $Ta_3N_5$  in our study.

#### **SI-4 Atomic structures of the (100)+ $O_N$ , (100)+ $Ba_{Ta}+O_N$ , (100)+ $Ba_{Ta}+2O_N$ and (100)+ $Ba_{Ta}+3O_N$ surface models**

As can be seen in Fig. S4, on the  $Ta_3N_5$  (100) surface, one ‘point’ N atom is removed and thus the Ta atom is now coordinated with five N atoms. Then, all possible configurations of the  $Ba_{Ta}+3O_N$  codoped  $Ta_3N_5$  (100) surface are shown in Fig. S5. It can be seen that, the substitutions of three O atoms for three N atoms on  $Ta_3N_5$  (100) surface can be divided into ‘0point+3plane’ and ‘1point+2plane’, which include four and six atomic configurations, respectively. Furthermore, the total energies (relative to the total energy of the undoped  $Ta_3N_5$  (100) surface) of all 10 configurations are listed in the following Table S3. It can be seen that, the total energy of the atomic configuration (c) is relatively smaller among all considered configurations. Therefore, the configuration (c) is adopted to simulate the  $Ba_{Ta}+3O_N$  codoped  $Ta_3N_5$  (100) surface in our work.

## References

1. C. G. Van de Walle and J. Neugebauer, *J. Appl. Phys.*, 2004, 95, 3851-3879.
2. L. Liu, W. Fan, X. Zhao, H. Sun, P. Li and L. Sun, *Langmuir*, 2012, 28, 10415-10424.
3. J. Wang, W. Luo, J. Feng, L. Zhang, Z. Li and Z. Zou, *Phys. Chem. Chem. Phys.*, 2013, 15, 16054-16064.
4. S. J. Henderson and A. L. Hector, *J. Solid State Chem.*, 2006, 179, 3518-3524.

**Table S1.** Surface energies of the undoped and  $O_N$ -doped  $Ta_3N_5$  (100) surface calculated using the non-symmetry and symmetry slab surface models. Surface energies under two growth conditions, Ta-rich and N-rich, are shown.

| Slab model   | Growth condition | Surface energies (J/m <sup>2</sup> ) |              |
|--------------|------------------|--------------------------------------|--------------|
|              |                  | (100)                                | (100)+ $O_N$ |
| non-symmetry | Ta-rich          | 1.22                                 | 1.10         |
|              | N-rich           | 1.22                                 | 1.19         |
| symmetry     | Ta-rich          | 1.23                                 | 1.13         |
|              | N-rich           | 1.23                                 | 1.22         |

**Table S2** total energies (relative to the total energy of the undoped Ta<sub>3</sub>N<sub>5</sub>) of all 14 configurations in Fig. S3.

| Configurations | Total energy (eV) | Configurations    | Total energy (eV)  |
|----------------|-------------------|-------------------|--------------------|
| (a)            | 3.66              | <b><u>(h)</u></b> | <b><u>3.10</u></b> |
| (b)            | 3.60              | (i)               | 3.59               |
| (c)            | 3.43              | (j)               | 3.42               |
| (d)            | 3.27              | (k)               | 3.41               |
| (e)            | 3.33              | (l)               | 3.53               |
| (f)            | 3.63              | (m)               | 3.65               |
| (g)            | 3.42              | (n)               | 3.38               |



**Table S3** total energies (relative to the total energy of the undoped Ta<sub>3</sub>N<sub>5</sub> (100) surface) of all

10 configurations in Fig. S5.

| Configurations | Total energy (eV)  | Configurations | Total energy (eV) |
|----------------|--------------------|----------------|-------------------|
| (a)            | 3.02               | (f)            | 3.75              |
| (b)            | 2.97               | (g)            | 3.43              |
| <b>(c)</b>     | <b><u>2.41</u></b> | (h)            | 3.23              |
| (d)            | 2.70               | (i)            | 3.54              |
| (e)            | 3.59               | (j)            | 3.80              |

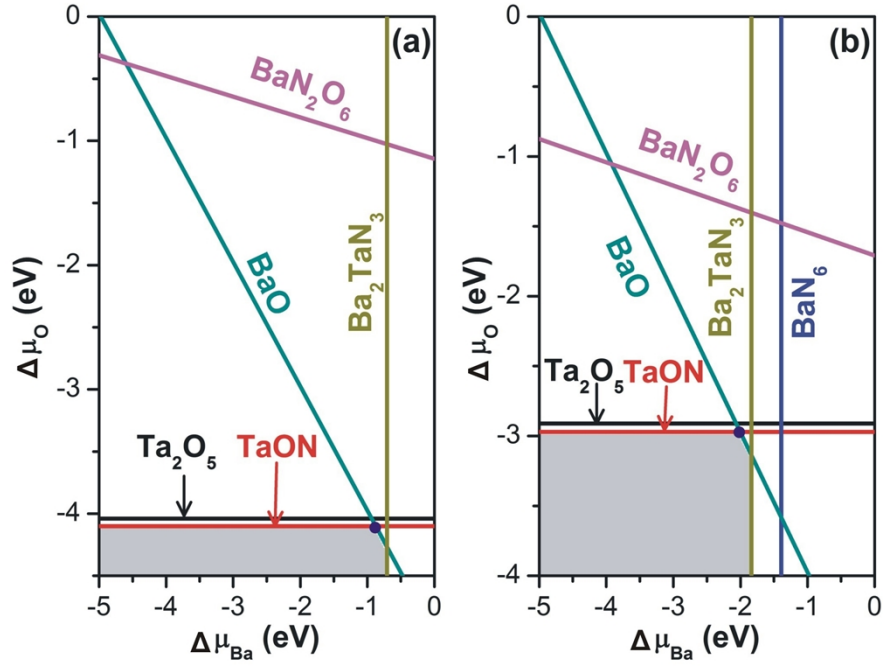

**Fig. S1** (Color online) Chemical potentials of  $\Delta\mu_{\text{Ba}}$  and  $\Delta\mu_{\text{O}}$  at the (a) Ta-rich and (b) N-rich growth conditions. The shaded areas in (a) and (b) are the accessible range of chemical potentials of Ba and O for equilibrium growth of the Ba-O codoped  $\text{Ta}_3\text{N}_5$ . In (a), the values at the blue point are selected for  $\Delta\mu_{\text{Ba}}$  and  $\Delta\mu_{\text{O}}$  under the Ti-rich condition. In (b), the values at the blue point are selected for  $\Delta\mu_{\text{Ba}}$  and  $\Delta\mu_{\text{O}}$  under the N-rich condition.

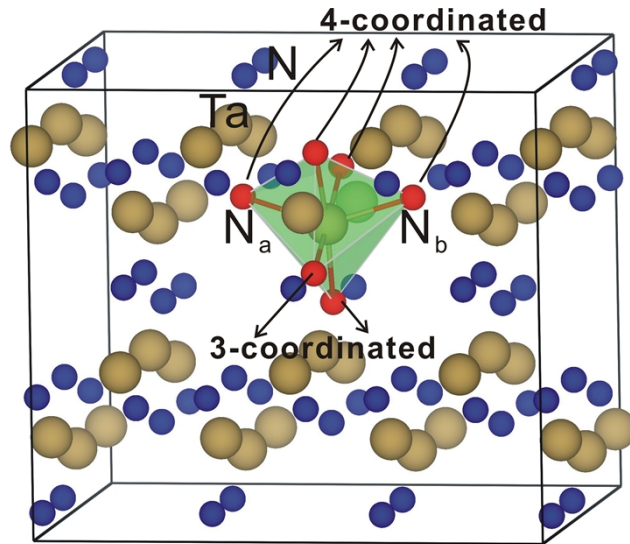

**Fig. S2** (Color online) Atomic structure of the  $3 \times 3 \times 1$   $\text{Ta}_3\text{N}_5$  supercell. In this supercell, the Ta atom is coordinated with six N atoms. Among the six N atoms in the Ta-N octahedron, four N atoms are the 4-coordinated N atoms while other two N atoms are the 3-coordinated N atoms. The position of the  $\text{N}_a$  is equivalent to that of the  $\text{N}_b$ .

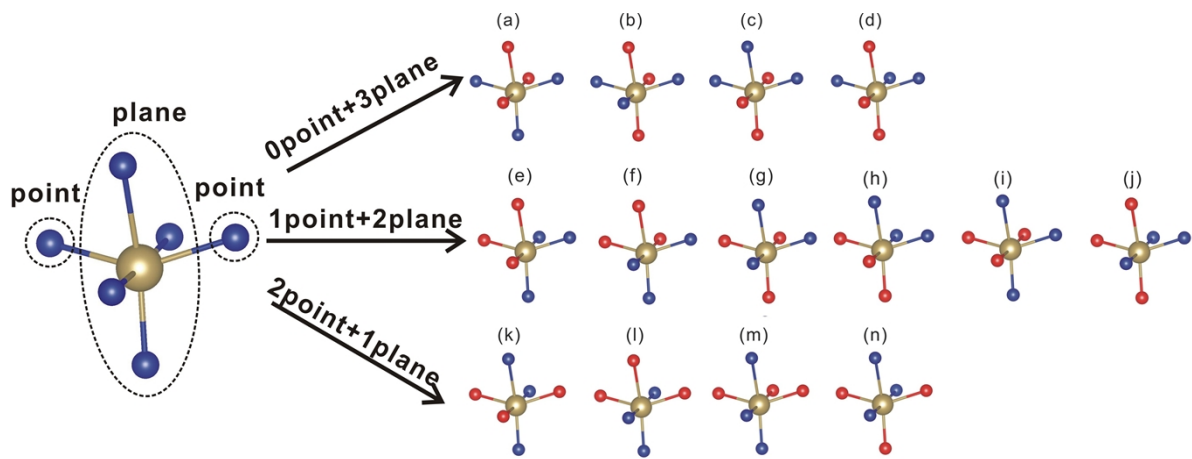

**Fig. S3** (Color online) Schematic diagram of the configurations of the  $3O_N$ -doped bulk  $Ta_3N_5$  structures. The yellow, blue and red balls are Ta, N and O atoms, respectively.

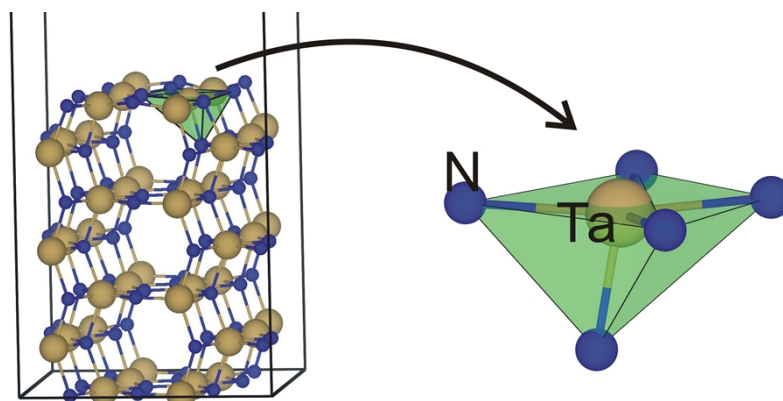

**Fig. S4** (Color online) Atomic structure of the Ta<sub>3</sub>N<sub>5</sub> (100) surface. On the top surface, the Ta atom is coordinated with five N atoms.

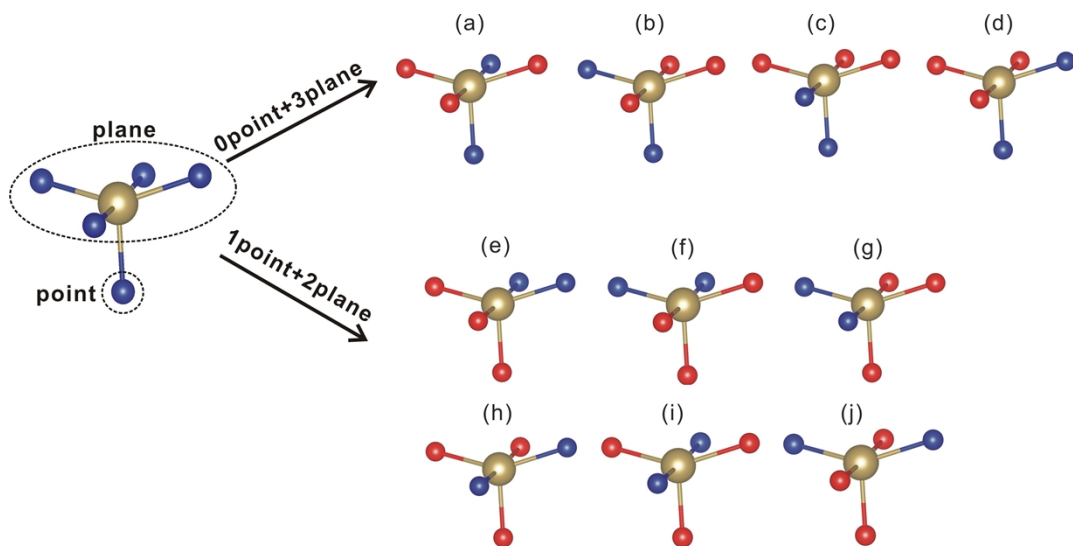

**Fig. S5** (Color online) Schematic diagram of the configurations of the 3O<sub>N</sub>-doped Ta<sub>3</sub>N<sub>5</sub> (100) surface. The yellow, blue and red balls are Ta, N and O atoms, respectively.
